# Supplementary material for: Enhanced oxygen evolution reactionviathe tunability of spin polarization and electronic states in a flexible van der Waals membranous catalyst
Source: Royal Society of Chemistry journal article supplement (doi:10.1039/d3cp02201c), 2023-01-01
Supplement: d3cp02201c1.pdf [file d3cp02201c1.pdf]

## Supporting Information

### Enhanced oxygen evolution reaction via the tunability of spin polarization and electronic states in a flexible van der Waals membranous catalyst

Hang Xu,<sup>a,b</sup> Ji Qi,<sup>a,b</sup> Yuan Zhang,<sup>b</sup> Linglong Hu,<sup>b,c</sup> Ming Feng,<sup>\*b</sup> and Weiming Lü<sup>\*a</sup>

<sup>a</sup>Functional Materials and Acousto-Optic Instruments Institute, School of Instrumentation Science and Engineering, Harbin 150080, China

<sup>b</sup>Key Laboratory of Functional Materials Physics and Chemistry of the Ministry of Education, Jilin Normal University, Changchun 130103, China

<sup>c</sup>Jilin Key Laboratory of Solid Laser Technology and Application, College of Science, Changchun University of Science and Technology, Changchun 130022, China

\*Corresponding authors

E-mail addresses: mingfeng@jlnu.edu.cn (M. Feng) and weiminglv@hit.edu.cn (W. M. Lü)

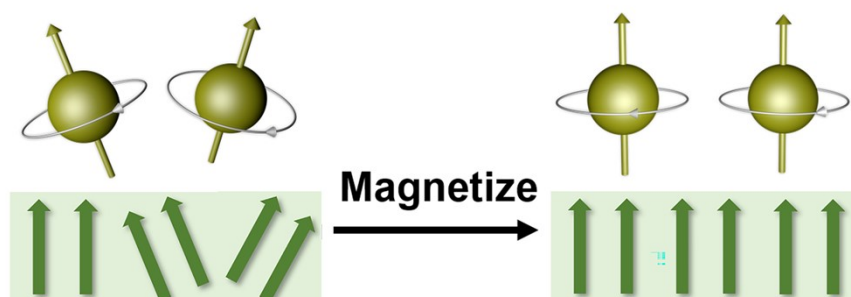

**Fig. S1** Schematic illustration of the spin-related OER mechanism of a TMO catalyst in alkaline conditions.

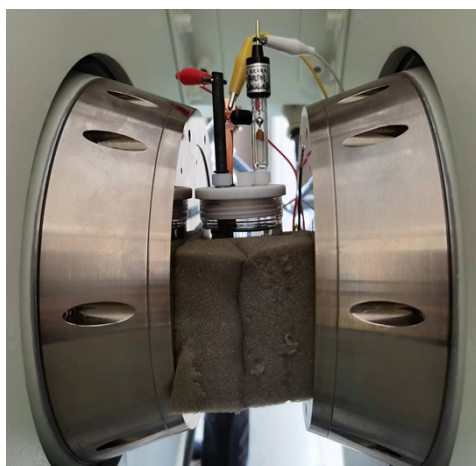

**Fig. S2** Electrochemical characterization under external magnetic field on OER performance of LSMO.

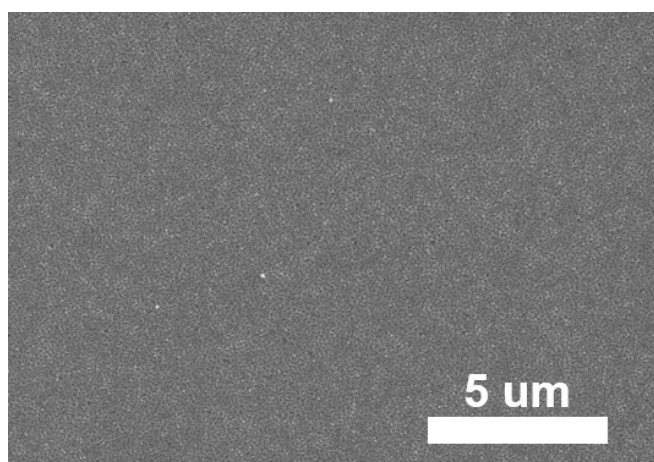

**Fig. S3** SEM image of LSMO thin film.

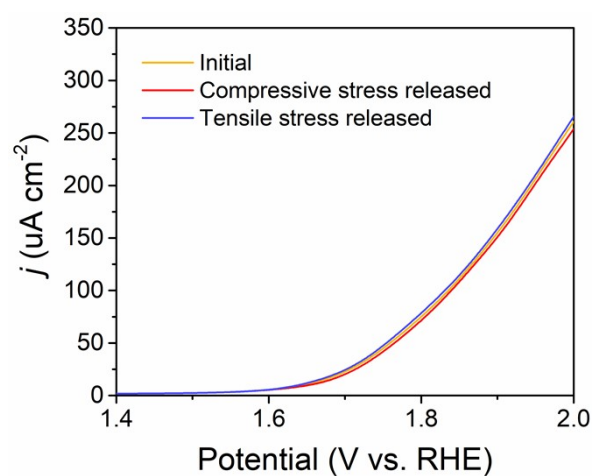

**Fig. S4** OER activity of LSMO thin film after stresses are released.
